# Supplementary material
Source: Research Square preprint supplement (doi:10.21203/rs.3.rs-9806393/v1)
Supplement: Supplementary file 1 [file 64963ede7bde1fc26d4c8a24.docx]

**Date:**

## **MEASUREMENT OF DISEASE-RELATED KNOWLEDGE LEVELS OF PARENTS OF PEDIATRIC PATIENTS FOLLOWED WITH CHRONIC KIDNEY DISEASE**

## Sociodemographic Characteristics

**Child’s name and surname:**

**Child’s age:**

**Child’s gender:** -

☐ Female

☐ Male

**Your age:**

**Your relationship to the child:** -

☐ Mother

☐ Father

**Who primarily takes care of your child during the day?**

☐ Mother

☐ Father

☐ Grandmother (maternal/paternal)

☐ Caregiver

☐ Other (please specify): …………………………………………

**Is there consanguinity between you and your spouse?**

☐ Yes

☐ No

**If yes, what is the degree of consanguinity?** ………………………………………………………………………………

**How many years has your child been followed with Chronic Kidney Disease (CKD)?**

☐ < 1 year

☐ 1–5 years

☐ > 5 years

**Has your child always been followed at our center due to CKD?**

☐ Yes

☐ No

**If no, at which centers was your child followed?**

☐ University Hospital

☐ Training and Research Hospital

☐ State Hospital

☐ Private Hospital

☐ Other (please specify): …………………………………………

**How often do you come to our center for follow-up?**

☐ More than once a month

☐ Once a month

☐ Every 3 months

☐ Every 6 months

☐ Once a year

☐ We do not attend regular follow-ups

**Does your child have another disease besides CKD? If yes, what is it?**

☐ Yes (please specify): …………………………………………

☐ No

**How many times has your child required hospitalization for treatment so far?**

☐ Never

☐ 1–2 times

☐ 3–5 times

☐ 6–10 times

☐ >10 times

**How many medications does your child use?**

☐ Does not use medication

☐ 1–2

☐ 3–5

☐ >5

**What medications does your child use and for what purposes?** ………………………………………

………………………………………

………………………………………

………………………………………

………………………………………

………………………………………

**What is your education level?**

☐ Illiterate

☐ Primary school

☐ Secondary school

☐ High school graduate

☐ Bachelor’s degree

☐ Master’s degree

**What is your occupation?** ………………………………………………………………………………

**What is your monthly income?**

☐ Below minimum wage

☐ Minimum wage

☐ Average income

☐ High income

☐ I do not earn income

**What is your spouse’s occupation?** ………………………………………………………………………………

**What is your spouse’s monthly income?**

☐ Below minimum wage

☐ Minimum wage

☐ Average income

☐ High income

☐ My spouse does not work

**Does your child attend school?**

☐ Formal education

☐ Online education

☐ Private education

☐ Does not attend school

**Which grade does your child attend?**

☐ Preschool

☐ Primary school

☐ Secondary school

☐ High school

☐ Does not attend school

**What is your child’s school attendance like?**

☐ <10 days absenteeism per year

☐ 10–30 days absenteeism per year

☐ >30 days absenteeism per year

**What is your child’s academic performance?**

☐ Below class average

☐ At class average

☐ Above class average

**How many people live in your household?** ………………………………………………………………………………

**With whom do you live?**

☐ Nuclear family (parents and children – please specify numbers)

☐ Second-degree relatives (grandparents)

☐ Third-degree relatives (aunt/uncle)

☐ Other (please specify): …………………………………………

**Do you have another child with a chronic disease?**

☐ Yes

☐ No

**If yes, what is the disease?** ………………………………………………………………………………

**Is there another person in the family with CKD? If yes, what is their relation to your child?**

☐ Yes (please specify): …………………………………………

☐ No

**Is there anyone in the family receiving dialysis treatment?**

☐ Yes (please specify): …………………………………………

☐ No

**Is there a healthcare worker in the family?**

☐ Yes (please specify): …………………………………………

☐ No

**Do you think you have sufficient knowledge about CKD?**

☐ Yes

☐ No

☐ Partially

**Do you think you have been adequately informed about CKD?**

☐ Yes

☐ No

☐ Partially

**Where do you obtain information about CKD?**

☐ Physician

☐ Internet (search engines)

☐ Social media

☐ Television

☐ Newspaper

☐ Relatives

☐ Other patients’ relatives

☐ Other (please specify): …………………………………………

**By whom are you evaluated during outpatient clinic visits?**

☐ Faculty physician

☐ Specialist physician

☐ Resident physician

☐ Intern physician

☐ I do not know

**Is your child regularly followed by the another department in our hospital?**

☐ Yes

☐ No

☐ Irregular follow-up

☐ I do not know

**If yes, which department do you attend?**

☐ Pediatric Cardiology

☐ Pediatric Urology

☐ Pediatric Surgery

☐ Dietitian

☐ Other (Please specify:……………)

## Clinical Characteristics (to be recorded from patient file)

- Blood pressure:
- Weight:
- Height:
- BMI:
- Medications used:
- Etiology of Chronic Kidney Disease:
- Age at diagnosis of Chronic Kidney Disease:

## Laboratory Characteristics (to be recorded from patient file)

- Creatinine clearance:
- Serum creatinine:
- Cystatin C (if available):
- Current stage of Chronic Kidney Disease:
- Stage of Chronic Kidney Disease at diagnosis:
- 24-hour urine proteinuria (if available):

## Knowledge Assessment

**Please mark the following statements as “True,” “False,” or “I don’t know.”**

The kidney removes excess water from the body by producing urine.

☐ True ☐ False ☐ I don’t know

The kidney removes harmful substances from the blood.

☐ True ☐ False ☐ I don’t know

The kidney is the main organ regulating blood sugar.

☐ True ☐ False ☐ I don’t know

The kidney regulates blood pressure.

☐ True ☐ False ☐ I don’t know

The kidney breaks down proteins in the body.

☐ True ☐ False ☐ I don’t know

The kidney affects bone health

☐ True ☐ False ☐ I don’t know

With appropriate healthy living conditions, a person can live a healthy life with one kidney.

☐ True ☐ False ☐ I don’t know

Chronic Kidney Disease is a progressive disease.

☐ True ☐ False ☐ I don’t know

Chronic Kidney Disease is a reversible disease.

☐ True ☐ False ☐ I don’t know

Chronic Kidney Disease has stages.

☐ True ☐ False ☐ I don’t know

Medical treatments can slow the progression of CKD.

☐ True ☐ False ☐ I don’t know

Herbal treatments can slow the progression of CKD.

☐ True ☐ False ☐ I don’t know

Nausea, vomiting, loss of appetite, and fatigue may be symptoms of CKD.

☐ True ☐ False ☐ I don’t know

Fever may be a symptom of CKD.

☐ True ☐ False ☐ I don’t know

Edema in the body may be a symptom of CKD.

☐ True ☐ False ☐ I don’t know

Decreased urine output may be a symptom of CKD.

☐ True ☐ False ☐ I don’t know

Increased urinary protein excretion may be a symptom of CKD.

☐ True ☐ False ☐ I don’t know

High blood pressure may be a symptom of CKD.

☐ True ☐ False ☐ I don’t know

CKD may be asymptomatic.

☐ True ☐ False ☐ I don’t know

CKD affects the musculoskeletal system in the long term.

☐ True ☐ False ☐ I don’t know

CKD causes anemia in the long term.

☐ True ☐ False ☐ I don’t know

CKD negatively affects growth in the long term.

☐ True ☐ False ☐ I don’t know

CKD may cause heart diseases in the long term.

☐ True ☐ False ☐ I don’t know

Blood tests are used to evaluate kidney function.

☐ True ☐ False ☐ I don’t know

Urine tests are used to evaluate kidney function.

☐ True ☐ False ☐ I don’t know

Stool tests are used to evaluate kidney function.

☐ True ☐ False ☐ I don’t know

Blood pressure monitoring is used to evaluate kidney function.

☐ True ☐ False ☐ I don’t know

In children, blood pressure values indicating hypertension are the same at all ages.

☐ True ☐ False ☐ I don’t know

Doses of medications used for CKD vary according to body weight.

☐ True ☐ False ☐ I don’t know

Doses of medications used for CKD vary according to kidney function.

☐ True ☐ False ☐ I don’t know

The daily protein intake of CKD patients should not be excessive.

☐ True ☐ False ☐ I don’t know

All CKD patients with hypertension should consume a low-salt diet.

☐ True ☐ False ☐ I don’t know

The daily phosphorus intake of CKD patients should be low.

☐ True ☐ False ☐ I don’t know

The daily calcium intake of CKD patients should be low.

☐ True ☐ False ☐ I don’t know

The daily water intake of CKD patients should be balanced.

☐ True ☐ False ☐ I don’t know

High potassium levels are life-threatening for CKD patients.

☐ True ☐ False ☐ I don’t know

All patients with CKD receive dialysis treatment.

☐ True ☐ False ☐ I don’t know

**Please mark the following questions as “Yes,” “No,” or “Partially.”**

Do you know the names and doses of the medications your patient use?

☐ Yes ☐ No ☐ Partially

Do you know the reason for using each medication?

☐ Yes ☐ No ☐ Partially

Do you know the stage of your child’s CKD?

☐ Yes (Answer: …………) ☐ No ☐ Partially

Do you know which medications should be avoided in CKD?

☐ Yes (Answer: …………) ☐ No ☐ Partially

Do you know your child’s most recent serum creatinine value?

☐ Yes (Answer: …………) ☐ No ☐ Partially

**You may mark more than one option**

What is/are the cause(s) of your child’s kidney disease?

☐ Genetic causes

☐ Congenital anomalies

☐ Glomerular causes

☐ Tubular causes

☐ Cystic kidney diseases

☐ I do not know

Which tests evaluated during outpatient follow-up are important for assessing kidney health?

☐ Serum creatinine

☐ Serum urea

☐ Serum AST

☐ Serum ALT

☐ Urinalysis

☐ Serum phosphorus

☐ Complete blood count

☐ Serum uric acid

☐ Serum potassium

☐ Blood gas analysis

☐ Serum GGT

☐ Urine culture

☐ Serum LDH

☐ Total bilirubin

☐ CRP

☐ Glucose

Which foods are rich in phosphorus?

☐ Red meat

☐ Arugula

☐ Milk and dairy products

☐ Pumpkin seeds

☐ Fish

☐ Packaged foods

Which foods are rich in potassium?

☐ Nuts

☐ Purslane

☐ Banana

☐ Potato

☐ Apple

☐ Processed foods

## Scoring

- **Questions 1–37:**
  - Each correct answer: 2 points
  - “I don’t know”: 0 points
  - Each incorrect answer: 0 points
- **Questions 38–39:**
  - Scored according to answers to Questions 15 and 16 of the Sociodemographic Characteristics Test
  - Yes: 2 points
  - Partially: 1 point
  - No: 0 points
- **Questions 40–41–42:**
  - Yes: 2 points
  - Partially: 1 point
  - No: 0 points
- **Question 43:**
  - Scored according to correct answer (checked from patient file)
  - Correct answer: 2 points
  - I do not know the cause: 0 points
  - Incorrect answer: 0 points
- **Questions 44–45–46:**
  - 0.5 points for each correctly selected / not selected option
- **Question 46:** Maximum 8 points
- **Question 47:** Maximum 3 points
- **Question 48:** Maximum 3 points

**Maximum total score: 100**
