# Supplementary material
Source: Research Square preprint supplement (doi:10.21203/rs.3.rs-9806393/v1)
Supplement: Supplementary file 2 [file 71a3b158ff1ac69b4aa1b5f9.docx]

**Supplement 3.** Assessment of the caregivers regarding CKD knowledge levels on their children

|  | | **Responses to the Questions** | |
| --- | --- | --- | --- |
| **Question** | | **n** | **%** |
| **Rate of caregivers knowing the etiology of the disease** | | 28 | 59.6 |
| **Rate of caregivers knowing the CKD stage of the patient** | | 25 | 53.2 |
| **Rate of caregivers knowing the patient's most recent serum creatinine level** | | 27 | 57.4 |
| **Do you know the names and doses of the medications your patient use?** | |  |  |
|  | Yes | 43 | 91.5 |
|  | No  Partially | 4  0 | 8,5  0.0 |
| **Rate of correctly knowing the names and dosages of medications used** | | 39 | 83.0 |
| **Do you know the reason for using each medication?** | |  |  |
|  | Yes | 38 | 80.9 |
|  | No | 7 | 14.9 |
|  | Partially | 2 | 4,3 |
| **Rate of correctly knowing the purpose of medications used** | | 16 | 34.0 |
| **Do you know which medication should be avoided in CKD?** | |  |  |
|  | Yes | 12 | 25.6 |
|  | No  Partially | 22  13 | 46.8  27.6 |
| **Rate of correctly knowing which medications should be avoided** | | 10 | 21,2 |
|  | | **Given Mean Correct Response Rate/Total Questions** | |
| **Which test(s) checked during outpatient follow-up are important in showing kidney health of your child?** | | 11.0 ± 2.4 /16  3.3 ± 1.2/6  3.6 ± 1.5/6 | |
| **Which foods are rich in phosphorus on your child’s diet?** | |
| **Which foods are rich in potassium on your child’s diet?** | |
