# Supplementary material
Source: Research Square preprint supplement (doi:10.21203/rs.3.rs-9806393/v1)
Supplement: Supplementary file 3 [file e8862d7f194330c6f4fbef08.docx]

**Supplement 2.** Answers of Caregivers to Questions About CKD Knowledge

|  | **Don't Know (n, %)** | **Correct (n, %)** | **Incorrect (n, %)** |
| --- | --- | --- | --- |
| **Kidney Functions** | | | |
| The kidney removes excess water from the body by producing urine. | 1 (2.1%) | 45 (95.7%) | 1 (2.1%) |
| The kidney removes harmful substances from the blood. | 7 (14.9%) | 39 (83.0%) | 1 (2.1%) |
| The kidney is the main organ regulating blood sugar. | 18 (38.3%) | 8 (17.0%) | 21 (44.7%) |
| The kidney regulates blood pressure. | 12 (25.5%) | 27 (57.4%) | 8 (17.0%) |
| The kidney breaks down proteins in the body. | 19 (40.4%) | 9 (19.1%) | 19 (40.4%) |
| The kidney affects bone health | 24 (51.1%) | 20 (42.6%) | 3 (6.4%) |
| With appropriate healthy living conditions, a person can live a healthy life with one kidney. | 3 (6.4) | 43 (91.5) | 1 (2.1) |
| **CKD- General Information** | | | |
| Chronic Kidney Disease is a progressive disease. | 6 (12.8%) | 37 (78.7%) | 4 (8.5%) |
| Chronic Kidney Disease is a reversible disease. | 13 (27.7%) | 22 (46.8%) | 12 (25.5%) |
| Chronic Kidney Disease has stages. | 9 (19.1%) | 37 (78.7%) | 1 (2.1%) |
| Medical treatments can slow the progression of CKD. | 5 (10.6%) | 39 (83.0%) | 3 (6.4%) |
| Herbal treatments can slow the progression of CKD. | 25 (53.2%) | 15 (31.9%) | 7 (14.9%) |
| **CKD- Symptoms** | | | |
| Nausea, vomiting, loss of appetite, and fatigue may be symptoms of CKD. | 7 (14.9%) | 36 (76.6%) | 4 (8.5%) |
| Fever may be a symptom of CKD. | 13 (27.7%) | 9 (19.1%) | 25 (53.2%) |
| Edema in the body may be a symptom of CKD. | 9 (19.1%) | 35 (74.5%) | 3 (6.4%) |
| Decreased urine output may be a symptom of CKD. | 3 (6.4%) | 44 (93.6%) | 0 (0%) |
| Increased urinary protein excretion may be a symptom of CKD. | 6 (12.8%) | 39 (83.0%) | 2 (4.3%) |
| High blood pressure may be a symptom of CKD. | 8 (17.0%) | 39 (83.0%) | 0 (0%) |
| CKD may be asymptomatic. | 20 (42.6%) | 20 (42.6%) | 7 (14.9%) |
| **CKD- Long-term Complications** | | | |
| CKD affects the musculoskeletal system in the long term. | 17 (36.2%) | 27 (57.4%) | 3 (6.4%) |
| CKD causes anemia in the long term. | 15 (31.9%) | 27 (57.4%) | 5 (10.6%) |
| CKD negatively affects growth in the long term. | 15 (31.9%) | 28 (59.6%) | 4 (8.5%) |
| CKD may cause heart diseases in the long term. | 18 (38.3%) | 25 (53.2%) | 4 (8.5%) |
| **CKD- Monitoring and Treatment** | | | |
| Blood tests are used to evaluate kidney function. | 0 (0%) | 47 (100%) | 0 (0%) |
| Urine tests are used to evaluate kidney function. | 1 (2.1%) | 46 (97.9%) | 0 (0%) |
| Stool tests are used to evaluate kidney function. | 13 (27.7%) | 25 (53.2%) | 9 (19.1%) |
| Blood pressure monitoring is used to evaluate kidney function. | 3 (6.4%) | 44 (93.6%) | 0 (0%) |
| In children, blood pressure values indicating hypertension are the same at all ages. | 14 (29.8%) | 28 (59.6%) | 5 (10.6%) |
| Doses of medications used for CKD vary according to body weight. | 16 (34.0%) | 31 (66.0%) | 0 (0%) |
| Doses of medications used for CKD vary according to kidney function. | 8 (17.0%) | 39 (83.0%) | 0 (0%) |
| All CKD patients receive dialysis treatment | 7 (14.9%) | 37 (78.7%) | 3 (6.4%) |
| **CKD – Diet** | | | |
| All CKD patients with hypertension should consume a low-salt diet. | 6 (12.8%) | 41 (87.2%) | 0 (0%) |
| The daily phosphorus intake of CKD patients should be low. | 18 (38.3%) | 28 (59.6%) | 1 (2.1%) |
| The daily calcium intake of CKD patients should be low. | 17 (36.2%) | 7 (14.9%) | 23 (48.9%) |
| The daily water intake of CKD patients should be balanced. | 4 (8.5%) | 43 (91.5%) | 0 (0%) |
| High potassium levels are life-threatening for CKD patients. | 15 (31.9%) | 31 (66.0%) | 1 (2.1%) |
| The daily protein intake of CKD patients should not be excessive. | 15 (31.9%) | 31 (66.0%) | 1 (2.1%) |
